# Supplementary material
Source: PubMed Central journal article supplement (PMC2662052)
Supplement: supp_283_44_29650__1.pdf [file supp_283_44_29650__1.pdf]

## R. Glen Uhrig

---

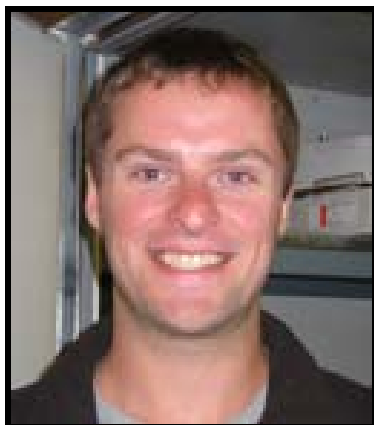

**Current Position:** Ph.D. Student in the Department of Biological Sciences (Biochemistry) at University of Calgary in Alberta, Canada

**Education:** M.Sc. in Plant Biochemistry (2007) from the Department of Biology at Queen's University in Ontario, Canada

**Non-scientific Interests:** Running, camping, mountain biking, and snowboarding

During my third year in the B.Sc. program at Queen's University in Kingston, Canada, I had the pleasure of being taught comparative biochemistry by Professor William C. Plaxton. It was during this course that I became intrigued with the organization and control of plant metabolism and consequently applied to work in the laboratory of Dr. Plaxton as a fourth year B.Sc. thesis student. My undergraduate research project with plant phosphoenolpyruvate carboxylase (PEPC) was exceptionally interesting. Consequently, I decided to pursue an M.Sc. degree doing research in the same laboratory to examine the PEPC interactome of developing *Ricinus communis* (castor) oil seed endosperm using a co-IP/proteomics approach. Upon completing the M.Sc. program, I conducted related research that led to the surprising discovery of PEPC monoubiquitination, which is presented in the current publication.

Overall, it was the opportunity to learn and employ classic native enzyme biochemistry, in combination with modern mass spectrometry techniques and bioinformatic databases, to examine novel aspects of plant PEPC that drew me to this project. I subsequently relocated to the laboratory of Professor Greg Moorhead at the University of Calgary where I am now conducting Ph.D. thesis research on phosphoprotein phosphatases from the model plant *Arabidopsis thaliana*.

---

**Read R. Glen Uhrig's article entitled:** Regulatory Monoubiquitination of Phosphoenolpyruvate Carboxylase in Germinating Castor Oil Seeds

<http://www.jbc.org/cgi/content/full/283/44/29897>
